# Supplementary material
Source: Springer Nature journal article supplement (https://www.springermedizin.de/resource/supplementary/12889_2011_4790_MOESM3_ESM.pdf/9491712)

**NO STIGMATIZING BELIEFS/ATTITUDES (%)**

40  
35  
30  
25  
20  
15  
10  
5  
0

NO EDUCATION

PRIMARY

SECONDARY

HIGHER

**EDUCATIONAL LEVEL**

URBAN  
RURAL

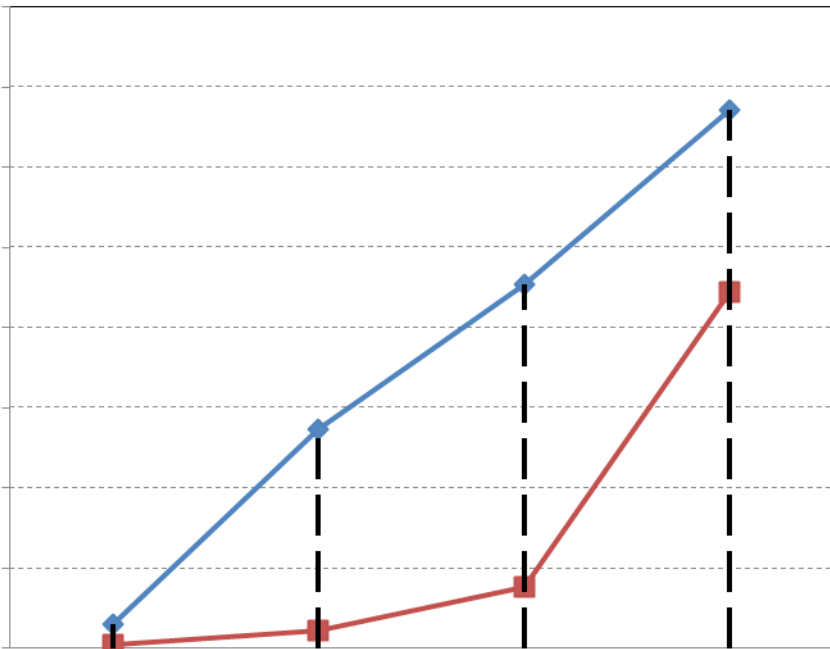

**NO STIGMATIZING BELIEFS/ATTITUDES (%)**

40  
35  
30  
25  
20  
15  
10  
5  
0

NO EDUCATION

PRIMARY

SECONDARY

HIGHER

**EDUCATIONAL LEVEL**

URBAN  
RURAL



Supplement: MOESM3 [file 9491712]
